# Supplementary material for: Atomic Charges, Surface Electrostatic Potential Analysis, and Bond Order Analysis on Nitriles and Isocyanides
Source: Research Square preprint supplement (doi:10.21203/rs.3.rs-424653/v1), 2021-05-04
Supplement: Supplementary file 1 [file c613bd3d1ddb56b19d7763e2.docx]

**Graphical abstract**


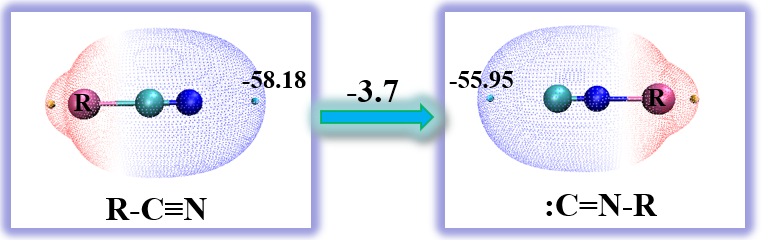


Surface electrostatic potential analyses, bond order analyses and isomerization energies for isocyanide-nitrile rearrangements were investigated systematically at B3LYP-D3(BJ)/def2-QZVP level.
